# Supplementary material for: Downregulation of S100 Calcium Binding Protein A9 in Esophageal Squamous Cell Carcinoma
Source: Hindawi journal article supplement (doi:10.1155/2015/325721), 2015-01-01
Supplement: f1 [file 325721.f1.pdf]

**Pawar et. al., 2013. Downregulation of calcium binding protein S100A9 in Esophageal Squamous Cell Carcinoma. Supplementary Table 1. Summary of IHC labeling for S100A9.**

| <b>Catalog</b> | <b>Position</b> | <b>Sex</b> | <b>Age</b> | <b>Pathology</b>                                                          | <b>Grade</b> | <b>TNM</b> | <b>Score</b>                                        |
|----------------|-----------------|------------|------------|---------------------------------------------------------------------------|--------------|------------|-----------------------------------------------------|
| FolioBio       | A1              | M          | 69         | Squamous cell carcinoma                                                   | I            | T3N0M0     | Few well differentiated keratinized tumor cell 1.5+ |
| FolioBio       | A2              | M          | 69         | Cancer adjacent normal esophageal tissue (chronic inflammation of mucosa) | -            | -          | 1+                                                  |
| FolioBio       | A3              | M          | 56         | Squamous cell carcinoma                                                   | I            | T3N0M0     | Few well differentiated keratinized tumor cell 1.5+ |
| FolioBio       | A4              | M          | 56         | Cancer adjacent normal esophageal tissue                                  | -            | -          | 2+                                                  |
| FolioBio       | A5              | M          | 62         | Squamous cell carcinoma                                                   | II           | T3N0M0     | Dysplasia 2+                                        |
| FolioBio       | A6              | M          | 62         | Cancer adjacent normal esophageal tissue                                  | -            | -          | 1.5+                                                |
| FolioBio       | A7              | M          | 58         | Squamous cell carcinoma                                                   | I            | T3N0M0     | Few well differentiated keratinized tumor cell 1.5+ |
| FolioBio       | A8              | M          | 58         | Cancer adjacent normal esophageal tissue (chronic inflammation of mucosa) | -            | -          | 0.5+                                                |
| FolioBio       | A9              | M          | 46         | Squamous cell carcinoma                                                   | I            | T3N0M0     | Keratinizing carcinoma 1.5+                         |
| FolioBio       | A10             | M          | 46         | Cancer adjacent normal esophageal tissue                                  | -            | -          | 0.5+                                                |
| FolioBio       | B1              | M          | 43         | Squamous cell carcinoma                                                   | I            | T2N0M0     | Few well differentiated keratinized tumor cell 1.5+ |
| FolioBio       | B2              | M          | 43         | Cancer adjacent normal esophageal tissue                                  | -            | -          | 1+                                                  |
| FolioBio       | B3              | F          | 61         | Squamous cell carcinoma                                                   | I            | T3N0M0     | Few well differentiated keratinized tumor cell 1+   |
| FolioBio       | B4              | F          | 61         | Cancer adjacent normal esophageal tissue                                  | -            | -          | 2+                                                  |

**Pawar et. al., 2013. Downregulation of calcium binding protein S100A9 in Esophageal Squamous Cell Carcinoma. Supplementary Table 1. Summary of IHC labeling for S100A9.**

| <b>Catalog</b> | <b>Position</b> | <b>Sex</b> | <b>Age</b> | <b>Pathology</b>                         | <b>Grade</b> | <b>TNM</b> | <b>Score</b>                                        |
|----------------|-----------------|------------|------------|------------------------------------------|--------------|------------|-----------------------------------------------------|
| FolioBio       | B5              | M          | 62         | Squamous cell carcinoma                  | II           | T2N0M0     | -                                                   |
| FolioBio       | B6              | M          | 62         | Cancer adjacent normal esophageal tissue | -            | -          | 1.5+                                                |
| FolioBio       | B7              | M          | 50         | Squamous cell carcinoma                  | I            | T2N1M0     | Well differentiated keratinized tumor cell 1.5+     |
| FolioBio       | B8              | M          | 50         | Cancer adjacent normal esophageal tissue | -            | -          | 2+                                                  |
| FolioBio       | B9              | M          | 68         | Squamous cell carcinoma                  | II           | T2N0M0     | Few well differentiated keratinized tumor cell 1.5+ |
| FolioBio       | B10             | M          | 68         | Cancer adjacent normal esophageal tissue | -            | -          | 2+                                                  |
| FolioBio       | C1              | M          | 65         | Squamous cell carcinoma                  | I            | T3N0M0     | Well differentiated keratinized tumor cell 1.5+     |
| FolioBio       | C2              | M          | 65         | Cancer adjacent normal esophageal tissue | -            | -          | 1+                                                  |
| FolioBio       | C3              | M          | 50         | Squamous cell carcinoma                  | II           | T2N0M0     | Few well differentiated keratinized tumor cell 2+   |
| FolioBio       | C4              | M          | 50         | Cancer adjacent normal esophageal tissue | -            | -          | 1.5+                                                |
| FolioBio       | C5              | M          | 60         | Squamous cell carcinoma                  | II           | T1N0M0     | -                                                   |
| FolioBio       | C6              | M          | 60         | Cancer adjacent normal esophageal tissue | -            | -          | 2+                                                  |
| FolioBio       | C7              | F          | 49         | Squamous cell carcinoma                  | II           | T3N0M0     | Keratinizing carcinoma 2+                           |
| FolioBio       | C8              | F          | 49         | Cancer adjacent normal esophageal tissue | -            | -          | 1.5+                                                |
| FolioBio       | C9              | F          | 59         | Squamous cell carcinoma                  | II           | T3N1M0     | -                                                   |
| FolioBio       | C10             | F          | 59         | Cancer adjacent normal esophageal tissue | -            | -          | 1+                                                  |

**Pawar et. al., 2013. Downregulation of calcium binding protein S100A9 in Esophageal Squamous Cell Carcinoma. Supplementary Table 1. Summary of IHC labeling for S100A9.**

| Catalog  | Position | Sex | Age | Pathology                                                                 | Grade | TNM    | Score                                             |
|----------|----------|-----|-----|---------------------------------------------------------------------------|-------|--------|---------------------------------------------------|
| FolioBio | D1       | M   | 43  | Squamous cell carcinoma                                                   | II    | T3N0M0 | Few well differentiated keratinized tumor cell 1+ |
| FolioBio | D2       | M   | 43  | Cancer adjacent normal esophageal tissue (chronic inflammation of mucosa) | -     | -      | 1.5+                                              |
| FolioBio | D3       | M   | 62  | Squamous cell carcinoma                                                   | II    | T2N2M0 | -                                                 |
| FolioBio | D4       | M   | 62  | Cancer adjacent normal esophageal tissue (sparse mucosa)                  | -     | -      | 1.5+                                              |
| FolioBio | D5       | M   | 62  | Squamous cell carcinoma                                                   | III   | T2N0M0 | -                                                 |
| FolioBio | D6       | M   | 62  | Cancer adjacent normal esophageal tissue                                  | -     | -      | 1.5+                                              |
| FolioBio | D7       | F   | 60  | Squamous cell carcinoma                                                   | II    | T3N1M0 | Few well differentiated keratinized tumor cell 1+ |
| FolioBio | D8       | F   | 60  | Cancer adjacent normal esophageal tissue (chronic inflammation of mucosa) | -     | -      | 2+                                                |
| FolioBio | D9       | F   | 54  | Squamous cell carcinoma                                                   | II    | T1N0M0 | -                                                 |
| FolioBio | D10      | F   | 54  | Cancer adjacent normal esophageal tissue                                  | -     | -      | 2+                                                |
| FolioBio | E1       | M   | 48  | Squamous cell carcinoma                                                   | II    | T3N0M0 | Well differentiated keratinized tumor cell 2+     |
| FolioBio | E2       | M   | 48  | Cancer adjacent normal esophageal tissue                                  | -     | -      | 1.5+                                              |
| FolioBio | E3       | M   | 57  | Squamous cell carcinoma                                                   | III   | T2N0M0 | -                                                 |
| FolioBio | E4       | M   | 57  | Cancer adjacent normal esophageal tissue                                  | -     | -      | 2+                                                |
| FolioBio | E5       | M   | 58  | Squamous cell carcinoma                                                   | II    | T3N0M0 | -                                                 |

**Pawar et. al., 2013. Downregulation of calcium binding protein S100A9 in Esophageal Squamous Cell Carcinoma. Supplementary Table 1. Summary of IHC labeling for S100A9.**

| <b>Catalog</b>  | <b>Position</b> | <b>Sex</b> | <b>Age</b> | <b>Pathology</b>                                                                 | <b>Grade</b> | <b>TNM</b>    | <b>Score</b>                                        |
|-----------------|-----------------|------------|------------|----------------------------------------------------------------------------------|--------------|---------------|-----------------------------------------------------|
| FolioBio        | E6              | M          | 58         | Cancer adjacent normal esophageal tissue                                         | -            | -             | 1.5+                                                |
| FolioBio        | E7              | F          | 53         | Squamous cell carcinoma                                                          | III          | T2N0M0        | -                                                   |
| FolioBio        | E8              | F          | 53         | Cancer adjacent normal esophageal tissue (chronic inflammation of mucosa)        | -            | -             | 1.5+                                                |
| FolioBio        | E9              | F          | 56         | Squamous cell carcinoma                                                          | II           | T3N0M0        | Few well differentiated keratinized tumor cell 1.5+ |
| FolioBio        | E10             | F          | 56         | Cancer adjacent normal esophageal tissue                                         | -            | -             | 2+                                                  |
| FolioBio        | F1              | M          | 76         | Squamous cell carcinoma                                                          | II           | T3N0M0        | Few well differentiated keratinized tumor cell 1+   |
| FolioBio        | F2              | M          | 76         | Cancer adjacent normal esophageal tissue (chronic inflammation of mucosa)        | -            | -             | 2+                                                  |
| FolioBio        | F3              | M          | 60         | Squamous cell carcinoma (sparse esophagus tissue)                                | I            | T2N0M0        | Well differentiated keratinized tumor cell 1.5+     |
| FolioBio        | F4              | M          | 60         | Cancer adjacent normal esophageal tissue                                         | -            | -             | 1.5+                                                |
| FolioBio        | F5              | M          | 53         | Squamous cell carcinoma                                                          | II           | T3N0M0        | Few well differentiated keratinized tumor cell 1+   |
| FolioBio        | F6              | M          | 53         | Cancer adjacent normal esophageal tissue                                         | -            | -             | 2+                                                  |
| <b>FolioBio</b> | <b>F7</b>       | <b>F</b>   | <b>49</b>  | <b>Carcinoma in situ</b>                                                         | -            | <b>T2N0M0</b> | <b>Dysplastic 1+</b>                                |
| <b>FolioBio</b> | <b>F8</b>       | <b>F</b>   | <b>49</b>  | <b>Cancer adjacent normal esophageal tissue (chronic inflammation of mucosa)</b> | -            | -             | <b>1.5+</b>                                         |
| FolioBio        | F9              | F          | 62         | Squamous cell carcinoma                                                          | II           | T3N0M0        | Few well differentiated keratinized tumor cell 1.5+ |

**Pawar et. al., 2013. Downregulation of calcium binding protein S100A9 in Esophageal Squamous Cell Carcinoma. Supplementary Table 1. Summary of IHC labeling for S100A9.**

| <b>Catalog</b> | <b>Position</b> | <b>Sex</b> | <b>Age</b> | <b>Pathology</b>                                                                                 | <b>Grade</b> | <b>TNM</b> | <b>Score</b>                                      |
|----------------|-----------------|------------|------------|--------------------------------------------------------------------------------------------------|--------------|------------|---------------------------------------------------|
| FolioBio       | F10             | F          | 62         | Cancer adjacent normal esophageal tissue                                                         | -            | -          | 2.5+                                              |
| FolioBio       | G1              | F          | 48         | Squamous cell carcinoma                                                                          | II           | T3N0M0     | Few well differentiated keratinized tumor cell 2+ |
| FolioBio       | G2              | F          | 48         | Cancer adjacent normal esophageal tissue (smooth muscle and mucous gland tissue)                 | -            | -          | Very little epithelium                            |
| FolioBio       | G3              | M          | 57         | Squamous cell carcinoma                                                                          | III          | T3N0M0     | -                                                 |
| FolioBio       | G4              | M          | 57         | Cancer adjacent normal esophageal tissue (fibrous tissue, blood vessel and smooth muscle tissue) | -            | -          | Very little epithelium                            |
| FolioBio       | G5              | M          | 45         | Squamous cell carcinoma                                                                          | III          | T2N0M0     | -                                                 |
| FolioBio       | G6              | M          | 45         | Cancer adjacent normal esophageal tissue (smooth muscle tissue)                                  | -            | -          | Very little epithelium                            |
| FolioBio       | G7              | F          | 55         | Squamous cell carcinoma                                                                          | III          | T1N0M0     | -                                                 |
| FolioBio       | G8              | F          | 55         | Cancer adjacent normal esophageal tissue                                                         | -            | -          | 1+                                                |
| FolioBio       | G9              | F          | 53         | Squamous cell carcinoma                                                                          | III          | T3N1M0     | -                                                 |
| FolioBio       | G10             | F          | 53         | Cancer adjacent normal esophageal tissue                                                         | -            | -          | 2+                                                |
| FolioBio       | H1              | M          | 68         | Squamous cell carcinoma                                                                          | III          | T3N0M0     | -                                                 |
| FolioBio       | H2              | M          | 68         | Cancer adjacent normal esophageal tissue (chronic inflammation of mucosa)                        | -            | -          | 1.5+                                              |
| FolioBio       | H3              | M          | 64         | Squamous cell carcinoma                                                                          | II           | T3N0M0     | -                                                 |

**Pawar et. al., 2013. Downregulation of calcium binding protein S100A9 in Esophageal Squamous Cell Carcinoma. Supplementary Table 1. Summary of IHC labeling for S100A9.**

| <b>Catalog</b> | <b>Position</b> | <b>Sex</b> | <b>Age</b> | <b>Pathology</b>                                                          | <b>Grade</b> | <b>TNM</b> | <b>Score</b>                                        |
|----------------|-----------------|------------|------------|---------------------------------------------------------------------------|--------------|------------|-----------------------------------------------------|
| FolioBio       | H4              | M          | 64         | Cancer adjacent normal esophageal tissue                                  | -            | -          | 1+                                                  |
| FolioBio       | H5              | M          | 55         | Squamous cell carcinoma                                                   | III          | T2N0M0     | -                                                   |
| FolioBio       | H6              | M          | 55         | Cancer adjacent normal esophageal tissue                                  | -            | -          | 1+                                                  |
| FolioBio       | H7              | F          | 63         | Squamous cell carcinoma                                                   | III          | T3N0M0     | -                                                   |
| FolioBio       | H8              | F          | 63         | Cancer adjacent normal esophageal tissue (chronic inflammation of mucosa) | -            | -          | 2+                                                  |
| FolioBio       | H9              | F          | 54         | Squamous cell carcinoma                                                   | III          | T3N0M0     | -                                                   |
| FolioBio       | H10             | F          | 54         | Cancer adjacent normal esophageal tissue                                  | -            | -          | 1.5+                                                |
| U.S. Biomax    | A1              | M          | 57         | Squamous cell carcinoma                                                   | II           | N.A        | Few well differentiated keratinized tumor cell 1.5+ |
| U.S. Biomax    | A2              | M          | 57         | Cancer adjacent tissue                                                    | -            | N.A        | 2+                                                  |
| U.S. Biomax    | A3              | F          | 49         | Squamous cell carcinoma                                                   | II           | N.A        | -                                                   |
| U.S. Biomax    | A4              | F          | 49         | Cancer adjacent tissue (chronic inflammation)                             | -            | N.A        | 1.5+                                                |
| U.S. Biomax    | A5              | F          | 50         | Squamous cell carcinoma (sparse)                                          | III          | N.A        | -                                                   |
| U.S. Biomax    | A6              | F          | 50         | Cancer adjacent tissue                                                    | -            | N.A        | 2+                                                  |
| U.S. Biomax    | A7              | M          | 57         | Squamous cell carcinoma                                                   | I            | N.A        | Few well differentiated keratinized tumor cell 1.5+ |
| U.S. Biomax    | A8              | M          | 57         | Cancer adjacent tissue (hyperplasia of squamous epithelium)               | -            | N.A        | 1+                                                  |
| U.S. Biomax    | A9              | M          | 58         | Squamous cell carcinoma                                                   | II           | N.A        | -                                                   |
| U.S. Biomax    | A10             | M          | 58         | Cancer adjacent tissue                                                    | -            | N.A        | 1+                                                  |
| U.S. Biomax    | A11             | M          | 60         | Squamous cell carcinoma                                                   | II           | N.A        | -                                                   |
| U.S. Biomax    | A12             | M          | 60         | Cancer adjacent tissue (chronic inflammation)                             | -            | N.A        | 1.5+                                                |

**Pawar et. al., 2013. Downregulation of calcium binding protein S100A9 in Esophageal Squamous Cell Carcinoma.  
Supplementary Table 1. Summary of IHC labeling for S100A9.**

| <b>Catalog</b>     | <b>Position</b> | <b>Sex</b> | <b>Age</b> | <b>Pathology</b>                                                                                    | <b>Grade</b> | <b>TNM</b> | <b>Score</b>                                               |
|--------------------|-----------------|------------|------------|-----------------------------------------------------------------------------------------------------|--------------|------------|------------------------------------------------------------|
| U.S. Biomax        | B1              | M          | 48         | Squamous cell carcinoma                                                                             | I            | N.A        | Few well differentiated keratinized tumor cell 2+          |
| U.S. Biomax        | B2              | M          | 48         | Cancer adjacent tissue (chronic inflammation)                                                       | -            | N.A        | 1.5+                                                       |
| U.S. Biomax        | B3              | M          | 44         | Squamous cell carcinoma                                                                             | II           | N.A        | Few well differentiated keratinized tumor cell 1.5+        |
| U.S. Biomax        | B4              | M          | 44         | Cancer adjacent tissue                                                                              | -            | N.A        | 2+                                                         |
| U.S. Biomax        | B5              | M          | 49         | Squamous cell carcinoma                                                                             | II           | N.A        | -                                                          |
| U.S. Biomax        | B6              | M          | 49         | Squamous cell carcinoma in situ                                                                     | -            | N.A        | 2+                                                         |
| U.S. Biomax        | B7              | M          | 52         | Squamous cell carcinoma (sparse)                                                                    | III          | N.A        | -                                                          |
| U.S. Biomax        | B8              | M          | 52         | Cancer adjacent tissue (chronic inflammation)                                                       | -            | N.A        | 1+                                                         |
| U.S. Biomax        | B9              | F          | 72         | Squamous cell carcinoma                                                                             | II           | N.A        | -                                                          |
| U.S. Biomax        | B10             | F          | 72         | Cancer adjacent tissue                                                                              | -            | N.A        | 1+                                                         |
| U.S. Biomax        | B11             | F          | 65         | Squamous cell carcinoma                                                                             | I            | N.A        | Few well differentiated keratinized tumor cell 1+          |
| U.S. Biomax        | B12             | F          | 65         | Cancer adjacent tissue (chronic inflammation)                                                       | -            | N.A        | 1+                                                         |
| U.S. Biomax        | C1              | M          | 70         | Squamous cell carcinoma                                                                             | III          | N.A        | -                                                          |
| U.S. Biomax        | C2              | M          | 70         | Cancer adjacent tissue (chronic inflammation of smooth muscle)                                      | -            | N.A        | Very little epithelium                                     |
| U.S. Biomax        | C3              | M          | 72         | Squamous cell carcinoma                                                                             | II           | N.A        | -                                                          |
| U.S. Biomax        | C4              | M          | 72         | Cancer adjacent tissue (hyperplasia of squamous epithelium)                                         | -            | N.A        | 2+                                                         |
| U.S. Biomax        | C5              | F          | 63         | Squamous cell carcinoma                                                                             | III          | N.A        | -                                                          |
| U.S. Biomax        | C6              | F          | 63         | Cancer adjacent tissue (smooth muscle)                                                              | -            | N.A        | Very little epithelium                                     |
| <b>U.S. Biomax</b> | <b>C7</b>       | <b>F</b>   | <b>50</b>  | <b>Cancer adjacent tissue (moderate atypical hyperplasia of epithelium)</b>                         | <b>-</b>     | <b>N.A</b> | <b>Few well differentiated keratinized tumor cell 1.5+</b> |
| <b>U.S. Biomax</b> | <b>C8</b>       | <b>F</b>   | <b>50</b>  | <b>Cancer adjacent tissue (chronic inflammation with severe atypical hyperplasia of epithelium)</b> | <b>-</b>     | <b>N.A</b> | <b>1+</b>                                                  |

**Pawar et. al., 2013. Downregulation of calcium binding protein S100A9 in Esophageal Squamous Cell Carcinoma.  
Supplementary Table 1. Summary of IHC labeling for S100A9.**

| <b>Catalog</b>     | <b>Position</b> | <b>Sex</b> | <b>Age</b> | <b>Pathology</b>                                                                                  | <b>Grade</b> | <b>TNM</b> | <b>Score</b>                                      |
|--------------------|-----------------|------------|------------|---------------------------------------------------------------------------------------------------|--------------|------------|---------------------------------------------------|
| U.S. Biomax        | C9              | F          | 53         | Squamous cell carcinoma                                                                           | II           | N.A        | Few well differentiated keratinized tumor cell 1+ |
| U.S. Biomax        | C10             | F          | 53         | Cancer adjacent tissue                                                                            | -            | N.A        | 1+                                                |
| U.S. Biomax        | C11             | M          | 53         | Squamous cell carcinoma                                                                           | I            | N.A        | Few well differentiated keratinized tumor cell 2+ |
| U.S. Biomax        | C12             | M          | 53         | Cancer adjacent tissue                                                                            | -            | N.A        | 1.5+                                              |
| U.S. Biomax        | D1              | M          | 51         | Squamous cell carcinoma                                                                           | II           | N.A        | -                                                 |
| U.S. Biomax        | D2              | M          | 51         | Cancer adjacent tissue (chronic inflammation of smooth muscle)                                    | -            | N.A        | Very little epithelium                            |
| <b>U.S. Biomax</b> | <b>D3</b>       | <b>M</b>   | <b>62</b>  | <b>Cancer adjacent tissue (chronic inflammation with mild atypical hyperplasia of epithelium)</b> | -            | <b>N.A</b> | -                                                 |
| <b>U.S. Biomax</b> | <b>D4</b>       | <b>M</b>   | <b>62</b>  | <b>Cancer adjacent tissue (chronic inflammation with hyperplasia of epithelium)</b>               | -            | <b>N.A</b> | <b>2+</b>                                         |
| U.S. Biomax        | D5              | F          | 49         | Squamous cell carcinoma                                                                           | III          | N.A        | -                                                 |
| U.S. Biomax        | D6              | F          | 49         | Cancer adjacent tissue                                                                            | -            | N.A        | 2+                                                |
| U.S. Biomax        | D7              | M          | 55         | Squamous cell carcinoma                                                                           | II           | N.A        | -                                                 |
| U.S. Biomax        | D8              | M          | 55         | Cancer adjacent tissue (chronic inflammation with hyperplasia of epithelium)                      | -            | N.A        | 2.5+                                              |
| U.S. Biomax        | D9              | M          | 50         | Squamous cell carcinoma                                                                           | I            | N.A        | Few well differentiated keratinized tumor cell 1+ |
| U.S. Biomax        | D10             | M          | 50         | Cancer adjacent tissue (chronic inflammation with hyperplasia of epithelium)                      | -            | N.A        | 2+                                                |
| U.S. Biomax        | D11             | M          | 43         | Squamous cell carcinoma                                                                           | II           | N.A        | -                                                 |
| U.S. Biomax        | D12             | M          | 43         | Cancer adjacent tissue                                                                            | -            | N.A        | 2+                                                |
| U.S. Biomax        | E1              | M          | 57         | Squamous cell carcinoma                                                                           | II           | N.A        | -                                                 |
| U.S. Biomax        | E2              | M          | 57         | Cancer adjacent tissue                                                                            | -            | N.A        | 2+                                                |
| <b>U.S. Biomax</b> | <b>E3</b>       | <b>M</b>   | <b>59</b>  | <b>Squamous cell carcinoma</b>                                                                    | <b>I</b>     | <b>N.A</b> | -                                                 |
| <b>U.S. Biomax</b> | <b>E4</b>       | <b>M</b>   | <b>59</b>  | <b>Squamous cell carcinoma</b>                                                                    | <b>I</b>     | <b>N.A</b> | -                                                 |



**Pawar et. al., 2013. Downregulation of calcium binding protein S100A9 in Esophageal Squamous Cell Carcinoma.  
Supplementary Table 1. Summary of IHC labeling for S100A9.**

| <b>Catalog</b>     | <b>Position</b> | <b>Sex</b> | <b>Age</b> | <b>Pathology</b>                                                                                      | <b>Grade</b> | <b>TNM</b> | <b>Score</b>                                      |
|--------------------|-----------------|------------|------------|-------------------------------------------------------------------------------------------------------|--------------|------------|---------------------------------------------------|
| U.S. Biomax        | E5              | M          | 72         | Squamous cell carcinoma                                                                               | III          | N.A        | -                                                 |
| U.S. Biomax        | E6              | M          | 72         | Cancer adjacent tissue                                                                                | -            | N.A        | 1.5+                                              |
| U.S. Biomax        | E7              | M          | 70         | Squamous cell carcinoma                                                                               | III          | N.A        | -                                                 |
| U.S. Biomax        | E8              | M          | 70         | Cancer adjacent tissue                                                                                | -            | N.A        | 2+                                                |
| U.S. Biomax        | E9              | M          | 63         | Squamous cell carcinoma (sparse)                                                                      | III          | N.A        | -                                                 |
| U.S. Biomax        | E10             | M          | 63         | Cancer adjacent tissue                                                                                | -            | N.A        | 2+                                                |
| U.S. Biomax        | E11             | F          | 50         | Squamous cell carcinoma                                                                               | II           | N.A        | Few well differentiated keratinized tumor cell 1+ |
| U.S. Biomax        | E12             | F          | 50         | Cancer adjacent tissue (smooth muscle)                                                                | -            | N.A        | Very little epithelium                            |
| U.S. Biomax        | F1              | M          | 68         | Squamous cell carcinoma                                                                               | III          | N.A        | -                                                 |
| U.S. Biomax        | F2              | M          | 68         | Cancer adjacent tissue (chronic inflammation with atypical hyperplasia of epithelium and canceration) | -            | N.A        | 2+                                                |
| U.S. Biomax        | F3              | F          | 60         | Squamous cell carcinoma                                                                               | III          | N.A        | -                                                 |
| U.S. Biomax        | F4              | F          | 60         | Cancer adjacent tissue (chronic inflammation)                                                         | -            | N.A        | 2+                                                |
| U.S. Biomax        | F5              | M          | 65         | Squamous cell carcinoma                                                                               | III          | N.A        | -                                                 |
| U.S. Biomax        | F6              | M          | 65         | Squamous cell carcinoma in situ                                                                       | -            | N.A        | Dysplasia 2.5+                                    |
| U.S. Biomax        | F7              | F          | 50         | Squamous cell carcinoma                                                                               | II           | N.A        | -                                                 |
| U.S. Biomax        | F8              | F          | 50         | Cancer adjacent tissue                                                                                | -            | N.A        | 2                                                 |
| U.S. Biomax        | F9              | M          | 49         | Early infiltrating squamous cell carcinoma                                                            | II           | N.A        | Few well differentiated keratinized tumor cell 1+ |
| U.S. Biomax        | F10             | M          | 49         | Cancer adjacent tissue                                                                                | -            | N.A        | 2.5+                                              |
| U.S. Biomax        | F11             | M          | 58         | Squamous cell carcinoma                                                                               | II           | N.A        | -                                                 |
| U.S. Biomax        | F12             | M          | 58         | Cancer adjacent tissue                                                                                | -            | N.A        | 2.5+                                              |
| U.S. Biomax        | G1              | M          | 78         | Squamous cell carcinoma                                                                               | III          | N.A        | -                                                 |
| U.S. Biomax        | G2              | M          | 78         | Cancer adjacent tissue (chronic inflammation)                                                         | -            | N.A        | 2.5+                                              |
| <b>U.S. Biomax</b> | <b>G3</b>       | <b>M</b>   | <b>56</b>  | <b>Squamous cell carcinoma</b>                                                                        | <b>III</b>   | <b>N.A</b> | <b>-</b>                                          |
| <b>U.S. Biomax</b> | <b>G4</b>       | <b>M</b>   | <b>56</b>  | <b>Squamous cell carcinoma</b>                                                                        | <b>III</b>   | <b>N.A</b> | <b>-</b>                                          |
| <b>U.S. Biomax</b> | <b>G5</b>       | <b>M</b>   | <b>55</b>  | <b>Squamous cell carcinoma</b>                                                                        | <b>II</b>    | <b>N.A</b> | <b>-</b>                                          |

**Pawar et. al., 2013. Downregulation of calcium binding protein S100A9 in Esophageal Squamous Cell Carcinoma.  
Supplementary Table 1. Summary of IHC labeling for S100A9.**

| <b>Catalog</b>     | <b>Position</b> | <b>Sex</b> | <b>Age</b> | <b>Pathology</b>                                                                               | <b>Grade</b> | <b>TNM</b> | <b>Score</b> |
|--------------------|-----------------|------------|------------|------------------------------------------------------------------------------------------------|--------------|------------|--------------|
| <b>U.S. Biomax</b> | <b>G6</b>       | <b>M</b>   | <b>55</b>  | <b>Squamous cell carcinoma in situ</b>                                                         | -            | <b>N.A</b> | <b>1.5+</b>  |
| U.S. Biomax        | G7              | M          | 60         | Squamous cell carcinoma                                                                        | III          | N.A        | -            |
| U.S. Biomax        | G8              | M          | 60         | Cancer adjacent tissue                                                                         | -            | N.A        | 2+           |
| U.S. Biomax        | G9              | M          | 61         | Squamous cell carcinoma                                                                        | III          | N.A        | -            |
| U.S. Biomax        | G10             | M          | 61         | Cancer adjacent tissue (chronic inflammation)                                                  | -            | N.A        | 2.5+         |
| U.S. Biomax        | G11             | M          | 46         | Squamous cell carcinoma                                                                        | II           | N.A        | -            |
| U.S. Biomax        | G12             | M          | 46         | Cancer adjacent tissue (focal mild atypical hyperplasia of squamous epithelium)                | -            | N.A        | 2.5+         |
| <b>U.S. Biomax</b> | <b>H1</b>       | <b>M</b>   | <b>57</b>  | <b>Squamous cell carcinoma</b>                                                                 | <b>III</b>   | <b>N.A</b> | <b>-</b>     |
| <b>U.S. Biomax</b> | <b>H2</b>       | <b>M</b>   | <b>57</b>  | <b>Squamous cell carcinoma</b>                                                                 | <b>III</b>   | <b>N.A</b> | <b>-</b>     |
| <b>U.S. Biomax</b> | <b>H3</b>       | <b>M</b>   | <b>57</b>  | <b>Squamous cell carcinoma</b>                                                                 | <b>II</b>    | <b>N.A</b> | <b>-</b>     |
| <b>U.S. Biomax</b> | <b>H4</b>       | <b>M</b>   | <b>57</b>  | <b>Squamous cell carcinoma</b>                                                                 | <b>III</b>   | <b>N.A</b> | <b>-</b>     |
| U.S. Biomax        | H5              | M          | 57         | Squamous cell carcinoma                                                                        | II           | N.A        | -            |
| U.S. Biomax        | H6              | M          | 57         | Cancer adjacent tissue (chronic inflammation with hyperplasia of epithelium)                   | -            | N.A        | 2+           |
| U.S. Biomax        | H7              | M          | 61         | Squamous cell carcinoma                                                                        | III          | N.A        | -            |
| U.S. Biomax        | H8              | M          | 61         | Cancer adjacent tissue                                                                         | -            | N.A        | 2+           |
| U.S. Biomax        | H9              | M          | 48         | Squamous cell carcinoma                                                                        | III          | N.A        | -            |
| U.S. Biomax        | H10             | M          | 48         | Cancer adjacent tissue (moderate atypical hyperplasia of squamous epithelium)                  | -            | N.A        | 3+           |
| U.S. Biomax        | H11             | M          | 59         | Squamous cell carcinoma                                                                        | II           | N.A        | -            |
| U.S. Biomax        | H12             | M          | 59         | Cancer adjacent tissue (chronic inflammation with moderate atypical hyperplasia of epithelium) | -            | N.A        | 1.5+         |
| U.S. Biomax        | I1              | M          | 49         | Squamous cell carcinoma                                                                        | III          | N.A        | -            |
| U.S. Biomax        | I2              | M          | 49         | Cancer adjacent tissue (gland and chronic inflammation of smooth muscle)                       | -            | N.A        | 2+           |

**Pawar et. al., 2013. Downregulation of calcium binding protein S100A9 in Esophageal Squamous Cell Carcinoma. Supplementary Table 1. Summary of IHC labeling for S100A9.**

| <b>Catalog</b> | <b>Position</b> | <b>Sex</b> | <b>Age</b> | <b>Pathology</b>                                                             | <b>Grade</b> | <b>TNM</b> | <b>Score</b>                                      |
|----------------|-----------------|------------|------------|------------------------------------------------------------------------------|--------------|------------|---------------------------------------------------|
| U.S. Biomax    | I3              | M          | 62         | Squamous cell carcinoma                                                      | III          | N.A        | -                                                 |
| U.S. Biomax    | I4              | M          | 62         | Squamous cell carcinoma                                                      | III          | N.A        | -                                                 |
| U.S. Biomax    | I5              | M          | 72         | Squamous cell carcinoma                                                      | III          | N.A        | -                                                 |
| U.S. Biomax    | I6              | M          | 72         | Cancer adjacent tissue (chronic inflammation)                                | -            | N.A        | 2+                                                |
| U.S. Biomax    | I7              | M          | 74         | Squamous cell carcinoma                                                      | III          | N.A        | -                                                 |
| U.S. Biomax    | I8              | M          | 74         | Cancer adjacent tissue (chronic inflammation)                                | -            | N.A        | 1+                                                |
| U.S. Biomax    | I9              | M          | 58         | Squamous cell carcinoma                                                      | II           | N.A        | -                                                 |
| U.S. Biomax    | I10             | M          | 58         | Cancer adjacent tissue                                                       | -            | N.A        | 2.5+                                              |
| U.S. Biomax    | I11             | M          | 73         | Squamous cell carcinoma                                                      | III          | N.A        | -                                                 |
| U.S. Biomax    | I12             | M          | 73         | Cancer adjacent tissue (chronic inflammation with hyperplasia of epithelium) | -            | N.A        | 2.5+                                              |
| U.S. Biomax    | J1              | F          | 57         | <b>Carcinosarcoma</b>                                                        | -            | N.A        | -                                                 |
| U.S. Biomax    | J2              | F          | 57         | Cancer adjacent tissue (smooth muscle)                                       | -            | N.A        | Very little epithelium                            |
| U.S. Biomax    | J3              | M          | 50         | <b>Malignant tumor from epithelium</b>                                       | -            | N.A        | -                                                 |
| U.S. Biomax    | J4              | M          | 50         | <b>Cancer adjacent tissue</b>                                                | -            | N.A        | <b>2+</b>                                         |
| U.S. Biomax    | J5              | M          | 71         | Squamous cell carcinoma                                                      | III          | N.A        | -                                                 |
| U.S. Biomax    | J6              | M          | 71         | Cancer adjacent tissue (chronic inflammation)                                | -            | N.A        | 2+                                                |
| U.S. Biomax    | J7              | M          | 49         | Squamous cell carcinoma                                                      | III          | N.A        | -                                                 |
| U.S. Biomax    | J8              | M          | 49         | Cancer adjacent tissue                                                       | -            | N.A        | 1.5+                                              |
| U.S. Biomax    | J9              | M          | 65         | Squamous cell carcinoma                                                      | III          | N.A        | -                                                 |
| U.S. Biomax    | J10             | M          | 65         | Cancer adjacent tissue                                                       | -            | N.A        | 2+                                                |
| U.S. Biomax    | J11             | M          | 56         | Squamous cell carcinoma                                                      | III          | N.A        | -                                                 |
| U.S. Biomax    | J12             | M          | 56         | Cancer adjacent tissue (hyperplasia of squamous epithelium)                  | -            | N.A        | 1.5+                                              |
| U.S. Biomax    | A1              | M          | 56         | Squamous cell carcinoma                                                      | IIa          | T2N0M0     | Few well differentiated keratinized tumor cell 2+ |

**Pawar et. al., 2013. Downregulation of calcium binding protein S100A9 in Esophageal Squamous Cell Carcinoma. Supplementary Table 1. Summary of IHC labeling for S100A9.**

| <b>Catalog</b> | <b>Position</b> | <b>Sex</b> | <b>Age</b> | <b>Pathology</b>                                                             | <b>Grade</b> | <b>TNM</b> | <b>Score</b>                                      |
|----------------|-----------------|------------|------------|------------------------------------------------------------------------------|--------------|------------|---------------------------------------------------|
| U.S. Biomax    | A2              | M          | 56         | Cancer adjacent tissue (fibrous tissue and smooth muscle)                    | -            | -          | Very little epithelium                            |
| U.S. Biomax    | A3              | M          | 60         | Squamous cell carcinoma                                                      | Ila          | T3N0M0     | -                                                 |
| U.S. Biomax    | A4              | M          | 60         | Cancer adjacent tissue (chronic inflammation with hyperplasia of epithelium) | -            | -          | 2+                                                |
| U.S. Biomax    | A5              | M          | 66         | Squamous cell carcinoma                                                      | Ila          | T3N0M0     | -                                                 |
| U.S. Biomax    | A6              | M          | 66         | Cancer adjacent tissue (reflux esophagitis)                                  | -            | -          | 2+                                                |
| U.S. Biomax    | A7              | F          | 72         | Squamous cell carcinoma (necrotic tissue)                                    | Ila          | T2N0M0     | -                                                 |
| U.S. Biomax    | A8              | F          | 72         | Cancer adjacent tissue (mild chronic inflammation)                           | -            | -          | 3+                                                |
| U.S. Biomax    | A9              | F          | 55         | Squamous cell carcinoma                                                      | Ila          | T3N0M0     | Few well differentiated keratinized tumor cell 1+ |
| U.S. Biomax    | A10             | F          | 55         | Cancer adjacent tissue (sparse)                                              | -            | -          | 3+                                                |
| U.S. Biomax    | A11             | M          | 61         | Squamous cell carcinoma                                                      | Ila          | T3N0M0     | -                                                 |
| U.S. Biomax    | A12             | M          | 61         | Cancer adjacent tissue (chronic inflammation)                                | -            | -          | 2+                                                |
| U.S. Biomax    | B1              | M          | 36         | Squamous cell carcinoma                                                      | Ila          | T3N0M0     | -                                                 |
| U.S. Biomax    | B2              | M          | 36         | Cancer adjacent tissue (chronic inflammation with hyperplasia of epithelium) | -            | -          | 2+                                                |
| U.S. Biomax    | B3              | F          | 42         | Squamous cell carcinoma                                                      | Ila          | T2N0M0     | 1+                                                |
| U.S. Biomax    | B4              | F          | 42         | Cancer adjacent tissue (chronic inflammation with hyperplasia of epithelium) | -            | -          | 2+                                                |

**Pawar et. al., 2013. Downregulation of calcium binding protein S100A9 in Esophageal Squamous Cell Carcinoma. Supplementary Table 1. Summary of IHC labeling for S100A9.**

| <b>Catalog</b> | <b>Position</b> | <b>Sex</b> | <b>Age</b> | <b>Pathology</b>                                                                   | <b>Grade</b> | <b>TNM</b> | <b>Score</b>                                      |
|----------------|-----------------|------------|------------|------------------------------------------------------------------------------------|--------------|------------|---------------------------------------------------|
| U.S. Biomax    | B5              | M          | 54         | Squamous cell carcinoma                                                            | Ila          | T2N0M0     | -                                                 |
| U.S. Biomax    | B6              | M          | 54         | Cancer adjacent tissue (reflux esophagitis)                                        | -            | -          | 2+                                                |
| U.S. Biomax    | B7              | F          | 55         | Squamous cell carcinoma                                                            | Ia           | T1N0M0     | Few well differentiated keratinized tumor cell 1+ |
| U.S. Biomax    | B8              | F          | 55         | Cancer adjacent tissue (reflux esophagitis)                                        | -            | -          | 1.5+                                              |
| U.S. Biomax    | B9              | M          | 57         | Squamous cell carcinoma (chronic inflammation of fibrous tissue and smooth muscle) | Ila          | T2N0M0     | -                                                 |
| U.S. Biomax    | B10             | M          | 57         | Cancer adjacent tissue (chronic inflammation with hyperplasia of epithelium)       | -            | -          | 1+                                                |
| U.S. Biomax    | B11             | F          | 57         | Squamous cell carcinoma                                                            | Ila          | T3N0M0     | -                                                 |
| U.S. Biomax    | B12             | F          | 57         | Cancer adjacent tissue (fibrous tissue and blood vessel)                           | -            | -          | Very little epithelium                            |
| U.S. Biomax    | C1              | M          | 64         | Squamous cell carcinoma                                                            | Ila          | T3N0M0     | -                                                 |
| U.S. Biomax    | C2              | M          | 64         | Cancer adjacent tissue                                                             | -            | -          | 3+                                                |
| U.S. Biomax    | C3              | M          | 48         | Squamous cell carcinoma                                                            | IIIa         | T3N1M0     | -                                                 |
| U.S. Biomax    | C4              | M          | 48         | Cancer adjacent tissue (chronic inflammation)                                      | -            | -          | 2+                                                |
| U.S. Biomax    | C5              | M          | 52         | Squamous cell carcinoma                                                            | Ila          | T3N0M0     | -                                                 |
| U.S. Biomax    | C6              | M          | 52         | Cancer adjacent tissue (fibrous tissue and blood vessel)                           | -            | -          | 1+                                                |
| U.S. Biomax    | C7              | F          | 54         | Squamous cell carcinoma                                                            | Ila          | T3N0M0     | -                                                 |

**Pawar et. al., 2013. Downregulation of calcium binding protein S100A9 in Esophageal Squamous Cell Carcinoma. Supplementary Table 1. Summary of IHC labeling for S100A9.**

| <b>Catalog</b>     | <b>Position</b> | <b>Sex</b> | <b>Age</b> | <b>Pathology</b>                                                                           | <b>Grade</b> | <b>TNM</b>    | <b>Score</b>                                        |
|--------------------|-----------------|------------|------------|--------------------------------------------------------------------------------------------|--------------|---------------|-----------------------------------------------------|
| U.S. Biomax        | C8              | F          | 54         | Cancer adjacent tissue (reflux esophagitis)                                                | -            | -             | 2+                                                  |
| U.S. Biomax        | C9              | M          | 50         | Squamous cell carcinoma                                                                    | Ila          | T3N0M0        | -                                                   |
| U.S. Biomax        | C10             | M          | 50         | Cancer adjacent tissue (chronic inflammation)                                              | -            | -             | 2+                                                  |
| U.S. Biomax        | C11             | F          | 62         | Squamous cell carcinoma                                                                    | Ila          | T2N0M0        | Few well differentiated keratinized tumor cell 1.5+ |
| U.S. Biomax        | C12             | F          | 62         | Cancer adjacent tissue (hyperplasia)                                                       | -            | -             | 2+                                                  |
| U.S. Biomax        | D1              | M          | 41         | Squamous cell carcinoma                                                                    | Ila          | T2N0M0        | -                                                   |
| U.S. Biomax        | D2              | M          | 41         | Cancer adjacent tissue                                                                     | -            | -             | 3+                                                  |
| <b>U.S. Biomax</b> | <b>D3</b>       | <b>F</b>   | <b>54</b>  | <b>Squamous cell carcinoma (sparse)</b>                                                    | -            | <b>TxN0M0</b> | -                                                   |
| <b>U.S. Biomax</b> | <b>D4</b>       | <b>F</b>   | <b>54</b>  | <b>Cancer adjacent tissue (reflux esophagitis)</b>                                         | -            | -             | <b>2.5+</b>                                         |
| U.S. Biomax        | D5              | M          | 51         | Squamous cell carcinoma                                                                    | Ila          | T2N0M0        | Few well differentiated keratinized tumor cell 1.5+ |
| U.S. Biomax        | D6              | M          | 51         | Cancer adjacent tissue (chronic inflammation with mild atypical hyperplasia of epithelium) | -            | -             | 2+                                                  |
| U.S. Biomax        | D7              | F          | 48         | Squamous cell carcinoma                                                                    | IIla         | T3N1M0        | -                                                   |
| U.S. Biomax        | D8              | F          | 48         | Cancer adjacent tissue (chronic inflammation)                                              | -            | -             | 2+                                                  |
| U.S. Biomax        | D9              | F          | 49         | Squamous cell carcinoma                                                                    | Ila          | T2N0M0        | -                                                   |
| U.S. Biomax        | D10             | F          | 49         | Cancer adjacent tissue (chronic inflammation)                                              | -            | -             | 3+                                                  |
| U.S. Biomax        | D11             | M          | 45         | Squamous cell carcinoma                                                                    | Ila          | T3N0M0        | -                                                   |
| U.S. Biomax        | D12             | M          | 45         | Cancer adjacent tissue (hyperplasia)                                                       | -            | -             | 2+                                                  |

**Pawar et. al., 2013. Downregulation of calcium binding protein S100A9 in Esophageal Squamous Cell Carcinoma. Supplementary Table 1. Summary of IHC labeling for S100A9.**

| <b>Catalog</b> | <b>Position</b> | <b>Sex</b> | <b>Age</b> | <b>Pathology</b>                                           | <b>Grade</b> | <b>TNM</b> | <b>Score</b>                                        |
|----------------|-----------------|------------|------------|------------------------------------------------------------|--------------|------------|-----------------------------------------------------|
| U.S. Biomax    | E1              | M          | 57         | Squamous cell carcinoma                                    | Ila          | T2N0M0     | -                                                   |
| U.S. Biomax    | E2              | M          | 57         | Cancer adjacent tissue (fibrous tissue and smooth muscle)  | -            | -          | 1+                                                  |
| U.S. Biomax    | E3              | M          | 58         | Squamous cell carcinoma                                    | Ila          | T3N0M0     | Few well differentiated keratinized tumor cell 1.5+ |
| U.S. Biomax    | E4              | M          | 58         | Cancer adjacent tissue                                     | -            | -          | 3+                                                  |
| U.S. Biomax    | E5              | M          | 76         | Squamous cell carcinoma (fibrous tissue and smooth muscle) | Ila          | T3N0M0     | -                                                   |
| U.S. Biomax    | E6              | M          | 76         | Cancer adjacent tissue (hyperplasia)                       | -            | -          | 2.5+                                                |
| U.S. Biomax    | E7              | M          | 51         | Squamous cell carcinoma                                    | Ila          | T3N0M0     | 1.5+                                                |
| U.S. Biomax    | E8              | M          | 51         | Cancer adjacent tissue                                     | -            | -          | 3+                                                  |
| U.S. Biomax    | E9              | M          | 60         | Squamous cell carcinoma                                    | Ila          | T3N0M0     | Few well differentiated keratinized tumor cell 1.5+ |
| U.S. Biomax    | E10             | M          | 60         | Cancer adjacent tissue (fibrous tissue and smooth muscle)  | -            | -          | 1+                                                  |
| U.S. Biomax    | E11             | F          | 57         | Squamous cell carcinoma                                    | Ila          | T2N0M0     | -                                                   |
| U.S. Biomax    | E12             | F          | 57         | Cancer adjacent tissue (chronic inflammation)              | -            | -          | 2+                                                  |
| U.S. Biomax    | F1              | M          | 62         | Squamous cell carcinoma                                    | Ila          | T2N0M0     | -                                                   |
| U.S. Biomax    | F2              | M          | 62         | Cancer adjacent tissue (hyperplasia)                       | -            | -          | 3+                                                  |
| U.S. Biomax    | F3              | F          | 60         | Squamous cell carcinoma                                    | Ila          | T3N0M0     | Few well differentiated keratinized tumor cell 1.5+ |
| U.S. Biomax    | F4              | F          | 60         | Cancer adjacent tissue                                     | -            | -          | 2.5+                                                |
| U.S. Biomax    | F5              | M          | 62         | Squamous cell carcinoma (sparse)                           | Ila          | T3N0M0     | -                                                   |
| U.S. Biomax    | F6              | M          | 62         | Cancer adjacent tissue (reflux esophagitis)                | -            | -          | 2+                                                  |

**Pawar et. al., 2013. Downregulation of calcium binding protein S100A9 in Esophageal Squamous Cell Carcinoma. Supplementary Table 1. Summary of IHC labeling for S100A9.**

| <b>Catalog</b> | <b>Position</b> | <b>Sex</b> | <b>Age</b> | <b>Pathology</b>                                                             | <b>Grade</b> | <b>TNM</b> | <b>Score</b>                                        |
|----------------|-----------------|------------|------------|------------------------------------------------------------------------------|--------------|------------|-----------------------------------------------------|
| U.S. Biomax    | F7              | M          | 69         | Squamous cell carcinoma                                                      | Ila          | T3N0M0     | -                                                   |
| U.S. Biomax    | F8              | M          | 69         | Cancer adjacent tissue (chronic inflammation)                                | -            | -          | 2+                                                  |
| U.S. Biomax    | F9              | M          | 48         | Squamous cell carcinoma                                                      | Ila          | T3N0M0     | -                                                   |
| U.S. Biomax    | F10             | M          | 48         | Cancer adjacent tissue (hyperplasia)                                         | -            | -          | 2+                                                  |
| U.S. Biomax    | F11             | M          | 66         | Squamous cell carcinoma                                                      | Ila          | T3N0M0     | -                                                   |
| U.S. Biomax    | F12             | M          | 66         | Cancer adjacent tissue (fibrous tissue and smooth muscle)                    | -            | -          | Very little epithelium                              |
| U.S. Biomax    | G1              | M          | 53         | Squamous cell carcinoma                                                      | Ila          | T3N0M0     | Few well differentiated keratinized tumor cell 1.5+ |
| U.S. Biomax    | G2              | M          | 53         | Cancer adjacent tissue (chronic inflammation)                                | -            | -          | 1+                                                  |
| U.S. Biomax    | G3              | M          | 72         | Squamous cell carcinoma                                                      | Ila          | T2N0M0     | -                                                   |
| U.S. Biomax    | G4              | M          | 72         | Cancer adjacent tissue (chronic inflammation)                                | -            | -          | 2+                                                  |
| U.S. Biomax    | G5              | M          | 57         | Squamous cell carcinoma                                                      | IIla         | T3N1M0     | -                                                   |
| U.S. Biomax    | G6              | M          | 57         | Cancer adjacent tissue (reflux esophagitis)                                  | -            | -          | 1+                                                  |
| U.S. Biomax    | G7              | M          | 63         | Squamous cell carcinoma                                                      | Ila          | T3N0M0     | -                                                   |
| U.S. Biomax    | G8              | M          | 63         | Cancer adjacent tissue                                                       | -            | -          | 1+                                                  |
| U.S. Biomax    | G9              | F          | 53         | Squamous cell carcinoma                                                      | IIla         | T3N1M0     | -                                                   |
| U.S. Biomax    | G10             | F          | 53         | Cancer adjacent tissue (chronic inflammation with hyperplasia of epithelium) | -            | -          | 2+                                                  |



**Pawar et. al., 2013. Downregulation of calcium binding protein S100A9 in Esophageal Squamous Cell Carcinoma. Supplementary Table 1. Summary of IHC labeling for S100A9.**

| <b>Catalog</b> | <b>Position</b> | <b>Sex</b> | <b>Age</b> | <b>Pathology</b>                                                                           | <b>Grade</b> | <b>TNM</b> | <b>Score</b>                                        |
|----------------|-----------------|------------|------------|--------------------------------------------------------------------------------------------|--------------|------------|-----------------------------------------------------|
| U.S. Biomax    | G11             | M          | 54         | Squamous cell carcinoma                                                                    | Ila          | T2N0M0     | Few well differentiated keratinized tumor cell 1.5+ |
| U.S. Biomax    | G12             | M          | 54         | Cancer adjacent tissue (hyperplasia)                                                       | -            | -          | 2+                                                  |
| U.S. Biomax    | H1              | M          | 58         | Squamous cell carcinoma                                                                    | Ila          | T3N0M0     | -                                                   |
| U.S. Biomax    | H2              | M          | 58         | Cancer adjacent tissue (chronic inflammation)                                              | -            | -          | 2+                                                  |
| U.S. Biomax    | H3              | F          | 65         | Squamous cell carcinoma                                                                    | Ila          | T3N0M0     | -                                                   |
| U.S. Biomax    | H4              | F          | 65         | Cancer adjacent tissue (chronic inflammation)                                              | -            | -          | 1+                                                  |
| U.S. Biomax    | H5              | M          | 54         | Squamous cell carcinoma                                                                    | IIla         | T3N1M0     | -                                                   |
| U.S. Biomax    | H6              | M          | 54         | Cancer adjacent tissue                                                                     | -            | -          | 3+                                                  |
| U.S. Biomax    | H7              | M          | 61         | Squamous cell carcinoma                                                                    | Ila          | T3N0M0     | -                                                   |
| U.S. Biomax    | H8              | M          | 61         | Cancer adjacent tissue (chronic inflammation with mild atypical hyperplasia of epithelium) | -            | -          | 2+                                                  |
| U.S. Biomax    | H9              | M          | 65         | Squamous cell carcinoma                                                                    | Ila          | T3N0M0     | -                                                   |
| U.S. Biomax    | H10             | M          | 65         | Cancer adjacent tissue (chronic inflammation)                                              | -            | -          | 1+                                                  |
| U.S. Biomax    | H11             | F          | 60         | Squamous cell carcinoma (smooth muscle)                                                    | Ia           | T1N0M0     | -                                                   |
| U.S. Biomax    | H12             | F          | 60         | Cancer adjacent tissue (hyperplasia)                                                       | -            | -          | 2+                                                  |
| U.S. Biomax    | I1              | F          | 72         | Squamous cell carcinoma                                                                    | Ila          | T2N0M0     | -                                                   |
| U.S. Biomax    | I2              | F          | 72         | Cancer adjacent tissue (reflux esophagitis)                                                | -            | -          | 1+                                                  |
| U.S. Biomax    | I3              | M          | 62         | Squamous cell carcinoma                                                                    | Ila          | T3N0M0     | Few well differentiated keratinized tumor cell 1.5+ |

**Pawar et. al., 2013. Downregulation of calcium binding protein S100A9 in Esophageal Squamous Cell Carcinoma. Supplementary Table 1. Summary of IHC labeling for S100A9.**

| <b>Catalog</b> | <b>Position</b> | <b>Sex</b> | <b>Age</b> | <b>Pathology</b>                              | <b>Grade</b> | <b>TNM</b> | <b>Score</b>                                      |
|----------------|-----------------|------------|------------|-----------------------------------------------|--------------|------------|---------------------------------------------------|
| U.S. Biomax    | I4              | M          | 62         | Cancer adjacent tissue                        | -            | -          | 2+                                                |
| U.S. Biomax    | I5              | M          | 62         | Squamous cell carcinoma                       | Ila          | T3N0M0     | -                                                 |
| U.S. Biomax    | I6              | M          | 62         | Cancer adjacent tissue                        | -            | -          | 3+                                                |
| U.S. Biomax    | I7              | M          | 64         | Squamous cell carcinoma                       | Ila          | T3N0M0     | Few well differentiated keratinized tumor cell 2+ |
| U.S. Biomax    | I8              | M          | 64         | Cancer adjacent tissue                        | -            | -          | 3+                                                |
| U.S. Biomax    | I9              | M          | 52         | Squamous cell carcinoma                       | Ila          | T3N0M0     | -                                                 |
| U.S. Biomax    | I10             | M          | 52         | Cancer adjacent tissue (gastric cardia)       | -            | -          | Very little epithelium                            |
| U.S. Biomax    | I11             | F          | 51         | Squamous cell carcinoma                       | Ila          | T3N0M0     | -                                                 |
| U.S. Biomax    | I12             | F          | 51         | Cancer adjacent tissue (reflux esophagitis)   | -            | -          | 2+                                                |
| U.S. Biomax    | J1              | F          | 66         | Squamous cell carcinoma                       | Ila          | T3N0M0     | 1+                                                |
| U.S. Biomax    | J2              | F          | 66         | Cancer adjacent tissue (chronic inflammation) | -            | -          | 1+                                                |
| U.S. Biomax    | J3              | F          | 41         | Squamous cell carcinoma (sparse)              | Ila          | T2N0M0     | -                                                 |
| U.S. Biomax    | J4              | F          | 41         | Cancer adjacent tissue                        | -            | -          | 2+                                                |
| U.S. Biomax    | J5              | M          | 50         | Squamous cell carcinoma                       | Ila          | T3N0M0     | -                                                 |
| U.S. Biomax    | J6              | M          | 50         | Cancer adjacent tissue (chronic inflammation) | -            | -          | 2+                                                |
| U.S. Biomax    | J7              | M          | 46         | Squamous cell carcinoma                       | Ila          | T3N0M0     | Few well differentiated keratinized tumor cell 2+ |
| U.S. Biomax    | J8              | M          | 46         | Cancer adjacent tissue (chronic inflammation) | -            | -          | 2+                                                |
| U.S. Biomax    | J9              | M          | 60         | Squamous cell carcinoma                       | IIla         | T3N1M0     | -                                                 |

**Pawar et. al., 2013. Downregulation of calcium binding protein S100A9 in Esophageal Squamous Cell Carcinoma. Supplementary Table 1. Summary of IHC labeling for S100A9.**

| <b>Catalog</b> | <b>Position</b> | <b>Sex</b> | <b>Age</b> | <b>Pathology</b>                              | <b>Grade</b> | <b>TNM</b> | <b>Score</b>                                        |
|----------------|-----------------|------------|------------|-----------------------------------------------|--------------|------------|-----------------------------------------------------|
| U.S. Biomax    | J10             | M          | 60         | Cancer adjacent tissue                        | -            | -          | 1+                                                  |
| U.S. Biomax    | J11             | M          | 65         | Carcinosarcoma                                | Ila          | T3N0M0     | -                                                   |
| U.S. Biomax    | J12             | M          | 65         | Cancer adjacent tissue (chronic inflammation) | -            | -          | 2+                                                  |
| U.S. Biomax    | A1              | F          | 49         | Squamous cell carcinoma                       | I            | N.A        | Well differentiated keratinized tumor cell 1.5+     |
| U.S. Biomax    | A2              | F          | 49         | Matched normal esophagus tissue               | -            | N.A        | 2.5+                                                |
| U.S. Biomax    | A3              | M          | 65         | Squamous cell carcinoma                       | I            | N.A        | Well differentiated keratinized tumor cell 1.5+     |
| U.S. Biomax    | A4              | M          | 65         | Matched normal esophagus tissue               | -            | N.A        | 2+                                                  |
| U.S. Biomax    | A5              | M          | 43         | Squamous cell carcinoma                       | I            | N.A        | Few well differentiated keratinized tumor cell 2+   |
| U.S. Biomax    | A6              | M          | 43         | Matched normal esophagus tissue of the above  | -            | N.A        | 2.5+                                                |
| U.S. Biomax    | A7              | F          | 56         | Squamous cell carcinoma                       | II           | N.A        | Few well differentiated keratinized tumor cell 1+   |
| U.S. Biomax    | A8              | F          | 56         | Mucosa chronic inflammation of esophagus      | -            | N.A        | 1.5+                                                |
| U.S. Biomax    | A9              | M          | 45         | Squamous cell carcinoma                       | II           | N.A        | -                                                   |
| U.S. Biomax    | A10             | M          | 45         | Mucosa chronic inflammation of esophagus      | -            | N.A        | 2.5+                                                |
| U.S. Biomax    | B1              | M          | 46         | Squamous cell carcinoma                       | I            | N.A        | Few well differentiated keratinized tumor cell 1.5+ |
| U.S. Biomax    | B2              | M          | 46         | Matched normal esophagus tissue of the above  | -            | N.A        | 3+                                                  |
| U.S. Biomax    | B3              | F          | 53         | Squamous cell carcinoma                       | III          | N.A        | -                                                   |
| U.S. Biomax    | B4              | F          | 53         | Mucosa chronic inflammation of esophagus      | -            | N.A        | 2+                                                  |

**Pawar et. al., 2013. Downregulation of calcium binding protein S100A9 in Esophageal Squamous Cell Carcinoma. Supplementary Table 1. Summary of IHC labeling for S100A9.**

| <b>Catalog</b> | <b>Position</b> | <b>Sex</b> | <b>Age</b> | <b>Pathology</b>                             | <b>Grade</b> | <b>TNM</b> | <b>Score</b>                                      |
|----------------|-----------------|------------|------------|----------------------------------------------|--------------|------------|---------------------------------------------------|
| U.S. Biomax    | B5              | M          | 69         | Squamous cell carcinoma                      | II           | N.A        | Few well differentiated keratinized tumor cell 1+ |
| U.S. Biomax    | B6              | M          | 69         | Mucosa chronic inflammation of esophagus     | -            | N.A        | 3+                                                |
| U.S. Biomax    | B7              | M          | 68         | Squamous cell carcinoma                      | II           | N.A        | -                                                 |
| U.S. Biomax    | B8              | M          | 68         | Matched normal esophagus tissue of the above | -            | N.A        | 2+                                                |
| U.S. Biomax    | B9              | F          | 53         | Squamous cell carcinoma                      | III          | N.A        | -                                                 |
| U.S. Biomax    | B10             | F          | 53         | Matched normal esophagus tissue of the above | -            | N.A        | 2+                                                |
| U.S. Biomax    | C1              | F          | 61         | Squamous cell carcinoma                      | I            | N.A        | Few well differentiated keratinized tumor cell 1+ |
| U.S. Biomax    | C2              | F          | 61         | Matched normal esophagus tissue of the above | -            | N.A        | 2.5+                                              |
| U.S. Biomax    | C3              | F          | 62         | Squamous cell carcinoma                      | II           | N.A        | Few well differentiated keratinized tumor cell 1+ |
| U.S. Biomax    | C4              | F          | 62         | Matched normal esophagus tissue of the above | -            | N.A        | 3+                                                |
| U.S. Biomax    | C5              | M          | 62         | Squamous cell carcinoma                      | I            | N.A        | Few well differentiated keratinized tumor cell 2+ |
| U.S. Biomax    | C6              | M          | 62         | Matched normal esophagus tissue of the above | -            | N.A        | 2.5+                                              |
| U.S. Biomax    | C7              | M          | 50         | Squamous cell carcinoma                      | I            | N.A        | Few well differentiated keratinized tumor cell 1+ |
| U.S. Biomax    | C8              | M          | 50         | Matched normal esophagus tissue of the above | -            | N.A        | 2.5+                                              |
| U.S. Biomax    | C9              | F          | 49         | Squamous cell carcinoma                      | II           | N.A        | -                                                 |
| U.S. Biomax    | C10             | F          | 49         | Matched normal esophagus tissue of the above | -            | N.A        | 2+                                                |
| U.S. Biomax    | D1              | M          | 56         | Squamous cell carcinoma                      | I            | N.A        | Few well differentiated keratinized tumor cell 1+ |

**Pawar et. al., 2013. Downregulation of calcium binding protein S100A9 in Esophageal Squamous Cell Carcinoma. Supplementary Table 1. Summary of IHC labeling for S100A9.**

| <b>Catalog</b> | <b>Position</b> | <b>Sex</b> | <b>Age</b> | <b>Pathology</b>                             | <b>Grade</b> | <b>TNM</b> | <b>Score</b>                                        |
|----------------|-----------------|------------|------------|----------------------------------------------|--------------|------------|-----------------------------------------------------|
| U.S. Biomax    | D2              | M          | 56         | Mucosa chronic inflammation of esophagus     | -            | N.A        | 2.5+                                                |
| U.S. Biomax    | D3              | M          | 62         | Squamous cell carcinoma                      | II           | N.A        | Few well differentiated keratinized tumor cell 2.5+ |
| U.S. Biomax    | D4              | M          | 62         | Matched normal esophagus tissue of the above | -            | N.A        | 2.5+                                                |
| U.S. Biomax    | D5              | M          | 65         | Squamous cell carcinoma                      | II           | N.A        | -                                                   |
| U.S. Biomax    | D6              | M          | 65         | Matched normal esophagus tissue of the above | -            | N.A        | 2.5+                                                |
| U.S. Biomax    | D7              | M          | 62         | Squamous cell carcinoma                      | I            | N.A        | Few well differentiated keratinized tumor cell 1+   |
| U.S. Biomax    | D8              | M          | 62         | Matched normal esophagus tissue of the above | -            | N.A        | 2.5+                                                |
| U.S. Biomax    | D9              | F          | 59         | Squamous cell carcinoma                      | II           | N.A        | -                                                   |
| U.S. Biomax    | D10             | F          | 59         | Matched normal esophagus tissue of the above | -            | N.A        | 1+                                                  |
| U.S. Biomax    | E1              | M          | 68         | Squamous cell carcinoma                      | II           | N.A        | Few well differentiated keratinized tumor cell 1+   |
| U.S. Biomax    | E2              | M          | 68         | Matched normal esophagus tissue of the above | -            | N.A        | 2+                                                  |
| U.S. Biomax    | E3              | M          | 57         | Squamous cell carcinoma                      | II           | N.A        | -                                                   |
| U.S. Biomax    | E4              | M          | 57         | Matched normal esophagus tissue of the above | -            | N.A        | 2.5+                                                |
| U.S. Biomax    | E5              | M          | 60         | Squamous cell carcinoma                      | II           | N.A        | Few well differentiated keratinized tumor cell 2.5+ |
| U.S. Biomax    | E6              | M          | 60         | Matched normal esophagus tissue of the above | -            | N.A        | 2.5+                                                |
| U.S. Biomax    | E7              | M          | 58         | Squamous cell carcinoma                      | I            | N.A        | Few well differentiated keratinized tumor cell 2+   |
| U.S. Biomax    | E8              | M          | 58         | Matched normal esophagus tissue of the above | -            | N.A        | 2.5+                                                |

**Pawar et. al., 2013. Downregulation of calcium binding protein S100A9 in Esophageal Squamous Cell Carcinoma. Supplementary Table 1. Summary of IHC labeling for S100A9.**

| <b>Catalog</b> | <b>Position</b> | <b>Sex</b> | <b>Age</b> | <b>Pathology</b>                             | <b>Grade</b> | <b>TNM</b> | <b>Score</b>                                      |
|----------------|-----------------|------------|------------|----------------------------------------------|--------------|------------|---------------------------------------------------|
| U.S. Biomax    | E9              | M          | 58         | Squamous cell carcinoma                      | I            | N.A        | Few well differentiated keratinized tumor cell 1+ |
| U.S. Biomax    | E10             | M          | 58         | Matched normal esophagus tissue of the above | -            | N.A        | 2.5+                                              |
| U.S. Biomax    | F1              | F          | 55         | Squamous cell carcinoma                      | III          | N.A        | -                                                 |
| U.S. Biomax    | F2              | F          | 55         | Mucosa chronic inflammation of esophagus     | -            | N.A        | 2+                                                |
| U.S. Biomax    | F3              | F          | 54         | Squamous cell carcinoma                      | II           | N.A        | -                                                 |
| U.S. Biomax    | F4              | F          | 54         | Matched normal esophagus tissue of the above | -            | N.A        | 2.5+                                              |
| U.S. Biomax    | F5              | M          | 50         | Squamous cell carcinoma                      | II           | N.A        | Few well differentiated keratinized tumor cell 1+ |
| U.S. Biomax    | F6              | M          | 50         | Matched normal esophagus tissue of the above | -            | N.A        | 2.5+                                              |
| U.S. Biomax    | F7              | M          | 48         | Squamous cell carcinoma                      | II           | N.A        | -                                                 |
| U.S. Biomax    | F8              | M          | 48         | Matched normal esophagus tissue of the above | -            | N.A        | 3+                                                |
| U.S. Biomax    | F9              | M          | 57         | Squamous cell carcinoma                      | II           | N.A        | Few well differentiated keratinized tumor cell 1+ |
| U.S. Biomax    | F10             | M          | 57         | Matched normal esophagus tissue of the above | -            | N.A        | 2.5+                                              |
| U.S. Biomax    | G1              | M          | 65         | Squamous cell carcinoma                      | I            | N.A        | Few well differentiated keratinized tumor cell 1+ |
| U.S. Biomax    | G2              | M          | 65         | Matched normal esophagus tissue of the above | -            | N.A        | 2+                                                |
| U.S. Biomax    | G3              | M          | 62         | Squamous cell carcinoma                      | II           | N.A        | -                                                 |
| U.S. Biomax    | G4              | M          | 62         | Matched normal esophagus tissue of the above | -            | N.A        | 2.5+                                              |
| U.S. Biomax    | G5              | F          | 60         | Squamous cell carcinoma                      | II           | N.A        | -                                                 |
| U.S. Biomax    | G6              | F          | 60         | Matched normal esophagus tissue of the above | -            | N.A        | 2.5+                                              |

**Pawar et. al., 2013. Downregulation of calcium binding protein S100A9 in Esophageal Squamous Cell Carcinoma. Supplementary Table 1. Summary of IHC labeling for S100A9.**

| <b>Catalog</b>   | <b>Position</b> | <b>Sex</b> | <b>Age</b> | <b>Pathology</b>                                 | <b>Grade</b> | <b>TNM</b> | <b>Score</b>                                      |
|------------------|-----------------|------------|------------|--------------------------------------------------|--------------|------------|---------------------------------------------------|
| U.S. Biomax      | G7              | F          | 48         | Squamous cell carcinoma                          | I            | N.A        | Few well differentiated keratinized tumor cell 2+ |
| U.S. Biomax      | G8              | F          | 48         | Matched normal esophagus tissue of the above     | -            | N.A        | 3+                                                |
| U.S. Biomax      | G9              | F          | 63         | Squamous cell carcinoma                          | II           | N.A        | Few well differentiated keratinized tumor cell 1+ |
| U.S. Biomax      | G10             | F          | 63         | Matched normal esophagus tissue of the above     | -            | N.A        | 3+                                                |
| U.S. Biomax      | H1              | M          | 60         | Squamous cell carcinoma                          | III          | N.A        | -                                                 |
| U.S. Biomax      | H2              | M          | 60         | Matched normal esophagus tissue of the above     | -            | N.A        | 2+                                                |
| U.S. Biomax      | H3              | M          | 55         | Squamous cell carcinoma                          | II           | N.A        | -                                                 |
| U.S. Biomax      | H4              | M          | 55         | Matched normal esophagus tissue of the above     | -            | N.A        | 2.5+                                              |
| U.S. Biomax      | H5              | M          | 53         | Squamous cell carcinoma                          | II           | N.A        | -                                                 |
| U.S. Biomax      | H6              | M          | 53         | Mucosa chronic inflammation of esophagus         | -            | N.A        | 3                                                 |
| U.S. Biomax      | H7              | M          | 64         | Squamous cell carcinoma                          | II           | N.A        | -                                                 |
| U.S. Biomax      | H8              | M          | 64         | Matched normal esophagus tissue of the above     | -            | N.A        | 1+                                                |
| U.S. Biomax      | H9              | F          | 54         | Squamous cell carcinoma                          | III          | N.A        | -                                                 |
| U.S. Biomax      | H10             | F          | 54         | Matched mucosa chronic inflammation of esophagus | -            | N.A        | 1+                                                |
| Indian Patient 1 | -               | F          | 45         | Cancer adjacent tissue                           | -            | N.A        | 3+                                                |
| Indian Patient 1 | -               | F          | 45         | Squamous cell carcinoma                          | II           | N.A        | Few well differentiated keratinized tumor cell 2+ |
| Indian Patient 2 | -               | F          | 50         | Cancer adjacent tissue                           | -            | N.A        | 2+                                                |
| Indian Patient 2 | -               | F          | 50         | Squamous cell carcinoma                          | III          | N.A        | -                                                 |
| Indian Patient 3 | -               | M          | 61         | Cancer adjacent tissue                           | -            | N.A        | 2+                                                |
| Indian Patient 3 | -               | M          | 61         | Squamous cell carcinoma                          | III          | N.A        | -                                                 |
| Indian Patient 4 | -               | M          | 48         | Cancer adjacent tissue                           | -            | N.A        | Very little epithelium                            |
| Indian Patient 4 | -               | M          | 48         | Squamous cell carcinoma                          | II           | N.A        | -                                                 |

**Pawar et. al., 2013. Downregulation of calcium binding protein S100A9 in Esophageal Squamous Cell Carcinoma. Supplementary Table 1. Summary of IHC labeling for S100A9.**

| <b>Catalog</b>    | <b>Position</b> | <b>Sex</b> | <b>Age</b> | <b>Pathology</b>        | <b>Grade</b> | <b>TNM</b> | <b>Score</b>                                        |
|-------------------|-----------------|------------|------------|-------------------------|--------------|------------|-----------------------------------------------------|
| Indian Patient 5  | -               | F          | 52         | Cancer adjacent tissue  | -            | N.A        | 2.5+                                                |
| Indian Patient 5  | -               | F          | 52         | Squamous cell carcinoma | III          | N.A        | -                                                   |
| Indian Patient 6  | -               | F          | 55         | Cancer adjacent tissue  | -            | N.A        | 2.5+                                                |
| Indian Patient 6  | -               | F          | 55         | Squamous cell carcinoma | III          | N.A        | -                                                   |
| Indian Patient 7  | -               | F          | 45         | Cancer adjacent tissue  | -            | N.A        | 2.5+                                                |
| Indian Patient 7  | -               | F          | 45         | Squamous cell carcinoma | I            | N.A        | 2+                                                  |
| Indian Patient 8  | -               | M          | 48         | Cancer adjacent tissue  | -            | N.A        | 3+                                                  |
| Indian Patient 8  | -               | M          | 48         | Squamous cell carcinoma | III          | N.A        | -                                                   |
| Indian Patient 9  | -               | F          | 43         | Cancer adjacent tissue  | -            | N.A        | 3+                                                  |
| Indian Patient 9  | -               | F          | 43         | Squamous cell carcinoma | II           | N.A        | -                                                   |
| Indian Patient 10 | -               | F          | 35         | Cancer adjacent tissue  | -            | N.A        | 3+                                                  |
| Indian Patient 10 | -               | F          | 35         | Squamous cell carcinoma | III          | N.A        | Few well differentiated keratinized tumor cell 1+   |
| Indian Patient 11 | -               | F          | 55         | Cancer adjacent tissue  | -            | N.A        | 3+                                                  |
| Indian Patient 11 | -               | F          | 55         | Squamous cell carcinoma | III          | N.A        | -                                                   |
| Indian Patient 12 | -               | F          | 34         | Cancer adjacent tissue  | -            | N.A        | 2+                                                  |
| Indian Patient 12 | -               | F          | 34         | Squamous cell carcinoma | III          | N.A        | Few well differentiated keratinized tumor cell 1.5+ |
| Indian Patient 13 | -               | M          | 41         | Cancer adjacent tissue  | -            | N.A        | 3+                                                  |
| Indian Patient 13 | -               | M          | 41         | Squamous cell carcinoma | I            | N.A        | Few well differentiated keratinized tumor cell 1+   |
| Indian Patient 14 | -               | F          | 77         | Cancer adjacent tissue  | -            | N.A        | 3+                                                  |
| Indian Patient 14 | -               | F          | 77         | Squamous cell carcinoma | III          | N.A        | -                                                   |
| Indian Patient 15 | -               | F          | 49         | Cancer adjacent tissue  | -            | N.A        | 3+                                                  |
| Indian Patient 15 | -               | F          | 49         | Squamous cell carcinoma | III          | N.A        | -                                                   |
| Indian Patient 16 | -               | F          | 32         | Cancer adjacent tissue  | -            | N.A        | 1.5+                                                |
| Indian Patient 16 | -               | F          | 32         | Squamous cell carcinoma | I            | N.A        | Few well differentiated keratinized tumor cell 1+   |
| Indian Patient 17 | -               | M          | 60         | Cancer adjacent tissue  | -            | N.A        | 2+                                                  |
| Indian Patient 17 | -               | M          | 60         | Squamous cell carcinoma | I            | N.A        | Few well differentiated keratinized tumor cell 1.5+ |
| Indian Patient 18 | -               | M          | 55         | Cancer adjacent tissue  | -            | N.A        | 3+                                                  |



**Pawar et. al., 2013. Downregulation of calcium binding protein S100A9 in Esophageal Squamous Cell Carcinoma. Supplementary Table 1. Summary of IHC labeling for S100A9.**

| <b>Catalog</b>    | <b>Position</b> | <b>Sex</b> | <b>Age</b> | <b>Pathology</b>        | <b>Grade</b> | <b>TNM</b> | <b>Score</b>                                        |
|-------------------|-----------------|------------|------------|-------------------------|--------------|------------|-----------------------------------------------------|
| Indian Patient 18 | -               | M          | 55         | Squamous cell carcinoma | II           | N.A        | -                                                   |
| Indian Patient 19 | -               | F          | 70         | Cancer adjacent tissue  | -            | N.A        | Very little epithelium                              |
| Indian Patient 19 | -               | F          | 70         | Squamous cell carcinoma | III          | N.A        | Few well differentiated keratinized tumor cell 1.5+ |
| Indian Patient 20 | -               | M          | 52         | Cancer adjacent tissue  | -            | N.A        | 1.5+                                                |
| Indian Patient 20 | -               | M          | 52         | Squamous cell carcinoma | II           | N.A        | -                                                   |
| Indian Patient 21 | -               | M          | 60         | Cancer adjacent tissue  | -            | N.A        | 3+                                                  |
| Indian Patient 21 | -               | M          | 60         | Squamous cell carcinoma | III          | N.A        | -                                                   |
| Indian Patient 22 | -               | F          | 55         | Cancer adjacent tissue  | -            | N.A        | 3+                                                  |
| Indian Patient 22 | -               | F          | 55         | Squamous cell carcinoma | III          | N.A        | -                                                   |
| Indian Patient 23 | -               | M          | 70         | Cancer adjacent tissue  | -            | N.A        | 3+                                                  |
| Indian Patient 23 | -               | M          | 70         | Squamous cell carcinoma | III          | N.A        | Few well differentiated keratinized tumor cell 1.5+ |
| Indian Patient 24 | -               | F          | 57         | Cancer adjacent tissue  | -            | N.A        | 2+                                                  |
| Indian Patient 24 | -               | F          | 57         | Squamous cell carcinoma | II           | N.A        | -                                                   |
| Indian Patient 25 | -               | M          | 68         | Cancer adjacent tissue  | -            | N.A        | 2.5+                                                |
| Indian Patient 25 | -               | M          | 68         | Squamous cell carcinoma | III          | N.A        | -                                                   |
| Indian Patient 26 | -               | F          | 65         | Cancer adjacent tissue  | -            | N.A        | 3+                                                  |
| Indian Patient 26 | -               | F          | 65         | Squamous cell carcinoma | III          | N.A        | Few well differentiated keratinized tumor cell 1+   |
| Indian Patient 27 | -               | M          | 62         | Cancer adjacent tissue  | -            | N.A        | 2.5+                                                |
| Indian Patient 27 | -               | M          | 62         | Squamous cell carcinoma | III          | N.A        | -                                                   |
| Indian Patient 28 | -               | M          | 55         | Cancer adjacent tissue  | -            | N.A        | 2.5+                                                |
| Indian Patient 28 | -               | M          | 55         | Squamous cell carcinoma | II           | N.A        | -                                                   |
| Indian Patient 29 | -               | M          | 55         | Cancer adjacent tissue  | -            | N.A        | 3+                                                  |
| Indian Patient 29 | -               | M          | 55         | Squamous cell carcinoma | III          | N.A        | -                                                   |
| Indian Patient 30 | -               | M          | 35         | Cancer adjacent tissue  | -            | N.A        | 3+                                                  |
| Indian Patient 30 | -               | M          | 35         | Squamous cell carcinoma | III          | N.A        | -                                                   |
| Indian Patient 31 | -               | M          | 60         | Cancer adjacent tissue  | -            | N.A        | 2+                                                  |
| Indian Patient 31 | -               | M          | 60         | Squamous cell carcinoma | III          | N.A        | -                                                   |
| Indian Patient 32 | -               | F          | 55         | Cancer adjacent tissue  | -            | N.A        | 2+                                                  |

**Pawar et. al., 2013. Downregulation of calcium binding protein S100A9 in Esophageal Squamous Cell Carcinoma. Supplementary Table 1. Summary of IHC labeling for S100A9.**

| <b>Catalog</b>    | <b>Position</b> | <b>Sex</b> | <b>Age</b> | <b>Pathology</b>        | <b>Grade</b> | <b>TNM</b> | <b>Score</b>                                        |
|-------------------|-----------------|------------|------------|-------------------------|--------------|------------|-----------------------------------------------------|
| Indian Patient 32 | -               | F          | 55         | Squamous cell carcinoma | III          | N.A        | Few well differentiated keratinized tumor cell 1+   |
| Indian Patient 33 | -               | M          | 40         | Cancer adjacent tissue  | -            | N.A        | 3+                                                  |
| Indian Patient 33 | -               | M          | 40         | Squamous cell carcinoma | II           | N.A        | -                                                   |
| Indian Patient 34 | -               | M          | 55         | Cancer adjacent tissue  | -            | N.A        | 1.5+                                                |
| Indian Patient 34 | -               | M          | 55         | Squamous cell carcinoma | III          | N.A        | -                                                   |
| Indian Patient 35 | -               | M          | 52         | Cancer adjacent tissue  | -            | N.A        | 1.5+                                                |
| Indian Patient 35 | -               | M          | 52         | Squamous cell carcinoma | I            | N.A        | Few well differentiated keratinized tumor cell 2+   |
| Indian Patient 36 | -               | M          | 58         | Cancer adjacent tissue  | -            | N.A        | 1.5+                                                |
| Indian Patient 36 | -               | M          | 58         | Squamous cell carcinoma | II           | N.A        | -                                                   |
| Indian Patient 37 | -               | M          | 65         | Cancer adjacent tissue  | -            | N.A        | 2.5+                                                |
| Indian Patient 37 | -               | M          | 65         | Squamous cell carcinoma | III          | N.A        | -                                                   |
| Indian Patient 38 | -               | M          | 52         | Cancer adjacent tissue  | -            | N.A        | 1+                                                  |
| Indian Patient 38 | -               | M          | 52         | Squamous cell carcinoma | III          | N.A        | -                                                   |
| Indian Patient 39 | -               | M          | 45         | Cancer adjacent tissue  | -            | N.A        | 3+                                                  |
| Indian Patient 39 | -               | M          | 45         | Squamous cell carcinoma | III          | N.A        | -                                                   |
| Indian Patient 40 | -               | M          | 60         | Cancer adjacent tissue  | -            | N.A        | 3+                                                  |
| Indian Patient 40 | -               | M          | 60         | Squamous cell carcinoma | II           | N.A        | Few well differentiated keratinized tumor cell 1.5+ |
| Indian Patient 41 | -               | M          | 59         | Cancer adjacent tissue  | -            | N.A        | 3+                                                  |
| Indian Patient 41 | -               | M          | 59         | Squamous cell carcinoma | II           | N.A        | -                                                   |
| Indian Patient 42 | -               | M          | 70         | Cancer adjacent tissue  | -            | N.A        | 2+                                                  |
| Indian Patient 42 | -               | M          | 70         | Squamous cell carcinoma | III          | N.A        | -                                                   |
| Indian Patient 43 | -               | M          | 50         | Cancer adjacent tissue  | -            | N.A        | 1.5+                                                |
| Indian Patient 43 | -               | M          | 50         | Squamous cell carcinoma | II           | N.A        | -                                                   |
| Indian Patient 44 | -               | M          | 55         | Cancer adjacent tissue  | -            | N.A        | 2+                                                  |
| Indian Patient 44 | -               | M          | 55         | Squamous cell carcinoma | II           | N.A        | -                                                   |
| Indian Patient 45 | -               | M          | 70         | Cancer adjacent tissue  | -            | N.A        | 1+                                                  |
| Indian Patient 45 | -               | M          | 70         | Squamous cell carcinoma | III          | N.A        | -                                                   |
| Indian Patient 46 | -               | M          | 36         | Cancer adjacent tissue  | -            | N.A        | 2.5+                                                |
| Indian Patient 46 | -               | M          | 36         | Squamous cell carcinoma | II           | N.A        | -                                                   |

**Pawar et. al., 2013. Downregulation of calcium binding protein S100A9 in Esophageal Squamous Cell Carcinoma. Supplementary Table 1. Summary of IHC labeling for S100A9.**

| <b>Catalog</b>    | <b>Position</b> | <b>Sex</b> | <b>Age</b> | <b>Pathology</b>        | <b>Grade</b> | <b>TNM</b> | <b>Score</b>                                        |
|-------------------|-----------------|------------|------------|-------------------------|--------------|------------|-----------------------------------------------------|
| Indian Patient 47 | -               | M          | 68         | Cancer adjacent tissue  | -            | N.A        | 2+                                                  |
| Indian Patient 47 | -               | M          | 68         | Squamous cell carcinoma | III          | N.A        | -                                                   |
| Indian Patient 48 | -               | F          | 80         | Cancer adjacent tissue  | -            | N.A        | 1+                                                  |
| Indian Patient 48 | -               | F          | 80         | Squamous cell carcinoma | II           | N.A        | -                                                   |
| Indian Patient 49 | -               | M          | 60         | Cancer adjacent tissue  | -            | N.A        | 2+                                                  |
| Indian Patient 49 | -               | M          | 60         | Squamous cell carcinoma | III          | N.A        | -                                                   |
| Indian Patient 50 | -               | F          | 50         | Cancer adjacent tissue  | -            | N.A        | 2.5+                                                |
| Indian Patient 50 | -               | F          | 50         | Squamous cell carcinoma | III          | N.A        | -                                                   |
| Indian Patient 51 | -               | F          | 65         | Cancer adjacent tissue  | -            | N.A        | 1.5+                                                |
| Indian Patient 51 | -               | F          | 65         | Squamous cell carcinoma | III          | N.A        | Few well differentiated keratinized tumor cell 1.5+ |
| Indian Patient 52 | -               | M          | 68         | Cancer adjacent tissue  | -            | N.A        | 1+                                                  |
| Indian Patient 52 | -               | M          | 68         | Squamous cell carcinoma | II           | N.A        | -                                                   |
| Indian Patient 53 | -               | M          | 42         | Cancer adjacent tissue  | -            | N.A        | 1+                                                  |
| Indian Patient 53 | -               | M          | 42         | Squamous cell carcinoma | III          | N.A        | -                                                   |
| Indian Patient 54 | -               | F          | 60         | Cancer adjacent tissue  | -            | N.A        | 2+                                                  |
| Indian Patient 54 | -               | F          | 60         | Squamous cell carcinoma | III          | N.A        | -                                                   |
| Indian Patient 55 | -               | M          | 40         | Cancer adjacent tissue  | -            | N.A        | 2+                                                  |
| Indian Patient 55 | -               | M          | 40         | Squamous cell carcinoma | III          | N.A        | Few well differentiated keratinized tumor cell 1+   |
| Indian Patient 56 | -               | M          | 66         | Cancer adjacent tissue  | -            | N.A        | 2.5+                                                |
| Indian Patient 56 | -               | M          | 66         | Squamous cell carcinoma | III          | N.A        | -                                                   |
| Indian Patient 57 | -               | M          | 58         | Cancer adjacent tissue  | -            | N.A        | 2.5+                                                |
| Indian Patient 57 | -               | M          | 58         | Squamous cell carcinoma | III          | N.A        | -                                                   |
| Indian Patient 58 | -               | M          | 51         | Cancer adjacent tissue  | -            | N.A        | 2+                                                  |
| Indian Patient 58 | -               | M          | 51         | Squamous cell carcinoma | III          | N.A        | -                                                   |
| Indian Patient 59 | -               | M          | 60         | Cancer adjacent tissue  | -            | N.A        | 1+                                                  |
| Indian Patient 59 | -               | M          | 60         | Squamous cell carcinoma | III          | N.A        | -                                                   |
| Indian Patient 60 | -               | M          | 60         | Cancer adjacent tissue  | -            | N.A        | 2+                                                  |
| Indian Patient 60 | -               | M          | 60         | Squamous cell carcinoma | III          | N.A        | -                                                   |
| Indian Patient 61 | -               | F          | 68         | Cancer adjacent tissue  | -            | N.A        | 1.5                                                 |
| Indian Patient 61 | -               | F          | 68         | Squamous cell carcinoma | II           | N.A        | -                                                   |

**Pawar et. al., 2013. Downregulation of calcium binding protein S100A9 in Esophageal Squamous Cell Carcinoma. Supplementary Table 1. Summary of IHC labeling for S100A9.**

| <b>Catalog</b>    | <b>Position</b> | <b>Sex</b> | <b>Age</b> | <b>Pathology</b>        | <b>Grade</b> | <b>TNM</b> | <b>Score</b>                                        |
|-------------------|-----------------|------------|------------|-------------------------|--------------|------------|-----------------------------------------------------|
| Indian Patient 62 | -               | M          | 42         | Cancer adjacent tissue  | -            | N.A        | 2+                                                  |
| Indian Patient 62 | -               | M          | 42         | Squamous cell carcinoma | II           | N.A        | -                                                   |
| Indian Patient 63 | -               | M          | 59         | Cancer adjacent tissue  | -            | N.A        | 1+                                                  |
| Indian Patient 63 | -               | M          | 59         | Squamous cell carcinoma | III          | N.A        | -                                                   |
| Indian Patient 64 | -               | M          | 61         | Cancer adjacent tissue  | -            | N.A        | 1+                                                  |
| Indian Patient 64 | -               | M          | 61         | Squamous cell carcinoma | III          | N.A        | -                                                   |
| Indian Patient 65 | -               | M          | 64         | Cancer adjacent tissue  | -            | N.A        | 1+                                                  |
| Indian Patient 65 | -               | M          | 64         | Squamous cell carcinoma | III          | N.A        | Few well differentiated keratinized tumor cell 1.5+ |
| Indian Patient 66 | -               | F          | 60         | Cancer adjacent tissue  | -            | N.A        | 1.5+                                                |
| Indian Patient 66 | -               | F          | 60         | Squamous cell carcinoma | III          | N.A        | -                                                   |
| Indian Patient 67 | -               | M          | 36         | Cancer adjacent tissue  | -            | N.A        | 2+                                                  |
| Indian Patient 67 | -               | M          | 36         | Squamous cell carcinoma | II           | N.A        | -                                                   |
| Indian Patient 68 | -               | F          | 65         | Cancer adjacent tissue  | -            | N.A        | 2+                                                  |
| Indian Patient 68 | -               | F          | 65         | Squamous cell carcinoma | II           | N.A        | -                                                   |
| Indian Patient 69 | -               | F          | 60         | Cancer adjacent tissue  | -            | N.A        | 1+                                                  |
| Indian Patient 69 | -               | M          | 60         | Squamous cell carcinoma | III          | N.A        | -                                                   |
| Indian Patient 70 | -               | M          | 47         | Cancer adjacent tissue  | -            | N.A        | 2.5+                                                |
| Indian Patient 70 | -               | F          | 47         | Squamous cell carcinoma | III          | N.A        | -                                                   |
| Indian Patient 71 | -               | F          | 50         | Cancer adjacent tissue  | -            | N.A        | 1+                                                  |
| Indian Patient 71 | -               | F          | 50         | Squamous cell carcinoma | III          | N.A        | -                                                   |
| Indian Patient 72 | -               | M          | 60         | Cancer adjacent tissue  | -            | N.A        | 2+                                                  |
| Indian Patient 72 | -               | M          | 60         | Squamous cell carcinoma | III          | N.A        | -                                                   |
| Indian Patient 73 | -               | M          | 56         | Cancer adjacent tissue  | -            | N.A        | 2+                                                  |
| Indian Patient 73 | -               | M          | 56         | Squamous cell carcinoma | II           | N.A        | Few well differentiated keratinized tumor cell 1.5+ |
| Indian Patient 74 | -               | M          | 59         | Cancer adjacent tissue  | -            | N.A        | 1+                                                  |
| Indian Patient 74 | -               | M          | 59         | Squamous cell carcinoma | II           | N.A        | -                                                   |
| Indian Patient 75 | -               | M          | 50         | Cancer adjacent tissue  | -            | N.A        | 2+                                                  |
| Indian Patient 75 | -               | M          | 50         | Squamous cell carcinoma | III          | N.A        | Few well differentiated keratinized tumor cell 1+   |
| Indian Patient 76 | -               | F          | 38         | Cancer adjacent tissue  | -            | N.A        | 2+                                                  |

**Pawar et. al., 2013. Downregulation of calcium binding protein S100A9 in Esophageal Squamous Cell Carcinoma. Supplementary Table 1. Summary of IHC labeling for S100A9.**

| <b>Catalog</b>    | <b>Position</b> | <b>Sex</b> | <b>Age</b> | <b>Pathology</b>        | <b>Grade</b> | <b>TNM</b> | <b>Score</b>                                        |
|-------------------|-----------------|------------|------------|-------------------------|--------------|------------|-----------------------------------------------------|
| Indian Patient 76 | -               | F          | 38         | Squamous cell carcinoma | III          | N.A        | -                                                   |
| Indian Patient 77 | -               | M          | 45         | Cancer adjacent tissue  | -            | N.A        | 2+                                                  |
| Indian Patient 77 | -               | M          | 45         | Squamous cell carcinoma | III          | N.A        | -                                                   |
| Indian Patient 78 | -               | M          | 58         | Cancer adjacent tissue  | -            | N.A        | 1+                                                  |
| Indian Patient 78 | -               | M          | 58         | Squamous cell carcinoma | III          | N.A        | -                                                   |
| Indian Patient 79 | -               | M          | 55         | Cancer adjacent tissue  | -            | N.A        | 1+                                                  |
| Indian Patient 79 | -               | M          | 55         | Squamous cell carcinoma | III          | N.A        | -                                                   |
| Indian Patient 80 | -               | F          | 50         | Cancer adjacent tissue  | -            | N.A        | 1.5+                                                |
| Indian Patient 80 | -               | F          | 50         | Squamous cell carcinoma | II           | N.A        | Few well differentiated keratinized tumor cell 1.5+ |
| Indian Patient 81 | -               | F          | 52         | Cancer adjacent tissue  | -            | N.A        | 3+                                                  |
| Indian Patient 81 | -               | F          | 52         | Squamous cell carcinoma | III          | N.A        | -                                                   |
| Indian Patient 82 | -               | M          | 56         | Cancer adjacent tissue  | -            | N.A        | 3+                                                  |
| Indian Patient 82 | -               | M          | 56         | Squamous cell carcinoma | III          | N.A        | -                                                   |
| Indian Patient 83 | -               | M          | 55         | Cancer adjacent tissue  | -            | N.A        | 2+                                                  |
| Indian Patient 83 | -               | M          | 55         | Squamous cell carcinoma | III          | N.A        | Few well differentiated keratinized tumor cell 1+   |
| Indian Patient 84 | -               | M          | 60         | Cancer adjacent tissue  | -            | N.A        | 1.5+                                                |
| Indian Patient 84 | -               | M          | 60         | Squamous cell carcinoma | III          | N.A        | -                                                   |
| Indian Patient 85 | -               | M          | 50         | Cancer adjacent tissue  | -            | N.A        | 2+                                                  |
| Indian Patient 85 | -               | M          | 50         | Squamous cell carcinoma | III          | N.A        | -                                                   |
| Indian Patient 86 | -               | F          | 55         | Cancer adjacent tissue  | -            | N.A        | 2+                                                  |
| Indian Patient 86 | -               | F          | 55         | Squamous cell carcinoma | III          | N.A        | Few well differentiated keratinized tumor cell 1.5+ |
| Indian Patient 87 | -               | M          | 50         | Cancer adjacent tissue  | -            | N.A        | 2+                                                  |
| Indian Patient 87 | -               | M          | 50         | Squamous cell carcinoma | I            | N.A        | Few well differentiated keratinized tumor cell 2+   |
| Indian Patient 88 | -               | M          | 48         | Cancer adjacent tissue  | -            | N.A        | 2+                                                  |
| Indian Patient 88 | -               | M          | 48         | Squamous cell carcinoma | II           | N.A        | -                                                   |
| Indian Patient 89 | -               | F          | 76         | Cancer adjacent tissue  | -            | N.A        | 2+                                                  |
| Indian Patient 89 | -               | F          | 76         | Squamous cell carcinoma | III          | N.A        | -                                                   |
| Indian Patient 90 | -               | F          | 70         | Cancer adjacent tissue  | -            | N.A        | 2+                                                  |

**Pawar et. al., 2013. Downregulation of calcium binding protein S100A9 in Esophageal Squamous Cell Carcinoma. Supplementary Table 1. Summary of IHC labeling for S100A9.**

| <b>Catalog</b>     | <b>Position</b> | <b>Sex</b> | <b>Age</b> | <b>Pathology</b>        | <b>Grade</b> | <b>TNM</b> | <b>Score</b>                                        |
|--------------------|-----------------|------------|------------|-------------------------|--------------|------------|-----------------------------------------------------|
| Indian Patient 90  | -               | F          | 70         | Squamous cell carcinoma | II           | N.A        | Few well differentiated keratinized tumor cell 1.5+ |
| Indian Patient 91  | -               | M          | 37         | Cancer adjacent tissue  | -            | N.A        | 2+                                                  |
| Indian Patient 91  | -               | M          | 37         | Squamous cell carcinoma | II           | N.A        | -                                                   |
| Indian Patient 92  | -               | M          | 50         | Cancer adjacent tissue  | -            | N.A        | 2+                                                  |
| Indian Patient 92  | -               | M          | 50         | Squamous cell carcinoma | II           | N.A        | Few well differentiated keratinized tumor cell 1.5+ |
| Indian Patient 93  | -               | M          | 60         | Cancer adjacent tissue  | -            | N.A        | 2+                                                  |
| Indian Patient 93  | -               | M          | 60         | Squamous cell carcinoma | I            | N.A        | Few well differentiated keratinized tumor cell 1+   |
| Indian Patient 94  | -               | M          | 70         | Cancer adjacent tissue  | -            | N.A        | 1.5+                                                |
| Indian Patient 94  | -               | M          | 70         | Squamous cell carcinoma | III          | N.A        | -                                                   |
| Indian Patient 95  | -               | M          | 72         | Cancer adjacent tissue  | -            | N.A        | 2+                                                  |
| Indian Patient 95  | -               | M          | 72         | Squamous cell carcinoma | III          | N.A        | -                                                   |
| Indian Patient 96  | -               | M          | 40         | Cancer adjacent tissue  | -            | N.A        | 2+                                                  |
| Indian Patient 96  | -               | M          | 40         | Squamous cell carcinoma | III          | N.A        | -                                                   |
| Indian Patient 97  | -               | M          | 43         | Cancer adjacent tissue  | -            | N.A        | 2+                                                  |
| Indian Patient 97  | -               | M          | 43         | Squamous cell carcinoma | III          | N.A        | -                                                   |
| Indian Patient 98  | -               | M          | 55         | Cancer adjacent tissue  | -            | N.A        | 1+                                                  |
| Indian Patient 98  | -               | M          | 55         | Squamous cell carcinoma | III          | N.A        | -                                                   |
| Indian Patient 99  | -               | F          | 50         | Cancer adjacent tissue  | -            | N.A        | 2+                                                  |
| Indian Patient 99  | -               | F          | 50         | Squamous cell carcinoma | III          | N.A        | -                                                   |
| Indian Patient 100 | -               | M          | 55         | Cancer adjacent tissue  | -            | N.A        | 2+                                                  |
| Indian Patient 100 | -               | M          | 55         | Squamous cell carcinoma | II           | N.A        | -                                                   |

**# P.S. We have excluded tumor and normal cores that are not paired or in duplicates or have tumor grading information missing from our analysis. The cores for which IHC scoring was excluded in our analysis are indicated in bold font.**
